# Supplementary material for: Tutorial: guidelines for annotating single-cell transcriptomic maps using automated and manual methods
Source: Springer Nature journal article supplement (doi:10.1038/s41596-021-00534-0), 2021-05-24
Supplement: MOESM1 [file 41596_2021_534_MOESM1_ESM18.pdf]

---

## Supplementary information

---

# Tutorial: guidelines for annotating single-cell transcriptomic maps using automated and manual methods

---

In the format provided by the  
authors and unedited

# Supplementary tables

Supplementary Table 1: Summary of annotation tools

| Tool                        | Type            | Language | Resolution        | Approach                                             | Allows "None"                                            | Notes                                                                                                                                                                                   |
|-----------------------------|-----------------|----------|-------------------|------------------------------------------------------|----------------------------------------------------------|-----------------------------------------------------------------------------------------------------------------------------------------------------------------------------------------|
| clustifyr <sup>1</sup>      | Reference-based | R        | Clusters of cells | Maximum correlation                                  | No                                                       | No statistical test, no benchmark available, demonstrated on reference bulk-RNAseq and microarray profiles                                                                              |
| singleCell Net <sup>2</sup> | Reference-based | R        | Single cells      | Relative-expression gene-pairs + Random Forest       | Yes, but rarely does so even when it should <sup>3</sup> | 10X-100X slower than other methods. High accuracy.                                                                                                                                      |
| scID <sup>4</sup>           | Reference-based | R        | Single cells      | Discriminant analysis + gaussian mixture models      | No                                                       | Only one premade reference for the mouse brain.                                                                                                                                         |
| scmap-cluster <sup>5</sup>  | Reference-based | R        | Single cells      | Consistent correlations                              | Yes                                                      | Fastest method available. Balances false-positives and false-negatives. Includes web-interface for use with a large set of pre-built references or custom reference.                    |
| scmap-cell <sup>5</sup>     | Reference-based | R        | Single cells      | Approximate nearest neighbours                       | Yes                                                      | Assigns individual cells to nearest neighbour cells in reference; allows mapping cell trajectories. Fast and scalable.                                                                  |
| singleR <sup>6</sup>        | Reference-based | R        | Single cells      | Hierarchical clustering, Spearman correlations       | No                                                       | Large pre-collated reference. Does not scale to data sets of 10,000 cells or more. Includes web-interface with pre-built reference                                                      |
| scMatch <sup>7</sup>        | Reference-based | python   | Single cells      | Correlation similarity                               | No                                                       | Scalable to large data sets. Reference data sets combining those from SingleR and FANTOM5. Assigns standardized cell ontology cell-type labels. Supports hierarchical cell-type labels. |
| scPred <sup>8</sup>         | Reference-based | R        | Single cells      | Principal component analysis, support vector machine | Yes                                                      | Can combine multiple reference data sets but these must be integrated a priori.                                                                                                         |
| LAmbDA <sup>9</sup>         | Reference-based | python   | Single cells      | Neural Network                                       | No                                                       | GPU optimized, many hyper parameters. No pre-trained models available, users must perform their own training.                                                                           |
| MetaNeighbor <sup>10</sup>  | Reference-based | R        | Single cells      | Spearman correlation                                 | No                                                       | Weighted voting of neighbouring cells.                                                                                                                                                  |

|                                   |                 |        |                   |                                                        |                   |                                                                                                                                                                                                                                                                                                                  |
|-----------------------------------|-----------------|--------|-------------------|--------------------------------------------------------|-------------------|------------------------------------------------------------------------------------------------------------------------------------------------------------------------------------------------------------------------------------------------------------------------------------------------------------------|
| CaSTLe <sup>11</sup>              | Reference-based | R      | Single cells      | Mutual Information, Random Forest                      | No                | Scalable to large data sets.                                                                                                                                                                                                                                                                                     |
| CHETAH <sup>12</sup>              | Reference-based | R      | Single cells      | Hierarchical clustering, correlations                  | Yes               | Allows intermediate annotations. Includes shiny graphical interface.                                                                                                                                                                                                                                             |
| Scikit learn <sup>13</sup>        | Reference-based | python | Multiple possible | KNN, SVM, RF, NMC, LDA                                 | Depends on design | Expertise required for correct design and appropriate training of classifier while avoiding overfitting.                                                                                                                                                                                                         |
| ACTINN <sup>14</sup>              | Reference-based | python | Single cells      | Neural network                                         | No                | Many hyperparameters that can affect accuracy. Pretrained models only available for Tabula Muris and human PBMC data.                                                                                                                                                                                            |
| Moana <sup>15</sup>               | Reference-based | python | Single cells      | Support Vector Machine (SVM), knn-smoothing            | No                | Training of the classifier may require subsetting the reference data.                                                                                                                                                                                                                                            |
| Cell BLAST <sup>16</sup>          | Reference-based | python | Single cells      | Neural network, low dimensional embedding              | Yes               | Finds similar cells to each input cell, enabling mapping of cell trajectories. Web-server with pre-trained model applicable to multiple species.                                                                                                                                                                 |
| OnClass <sup>17</sup>             | Reference-based | python | Single cells      | Non-linear projection                                  | Yes               | Cells are projected onto a cell-ontology space learned from a reference data set. Uses cell-ontology hierarchy to extend general labels beyond specific cell-types present in the training data. Pretrained model for the Tabula Muris data available. Once trained, the model is scalable to millions of cells. |
| AUCell <sup>18</sup>              | Marker-based    | R      | Single cells      | Area Under the Curve to estimate enrichment of markers | Yes               | Due to low detection rates at the level of single cells requires many markers for every cell-type.                                                                                                                                                                                                               |
| SCINA <sup>19</sup>               | Marker-based    | R      | Single cells      | Expectation-Maximization, Gaussian mixture model       | (optional)        | Simultaneously clusters and annotates cells. Robust to the inclusion of incorrect marker genes.                                                                                                                                                                                                                  |
| SCSA <sup>20</sup>                | Marker-based    | python | Clusters of cells | Evidence-weighted scores                               | Yes               | Uses integrated reference from CellMarker and CancerSEA for human and mouse but allows custom marker tables. Automatically reformats outputs from scanpy, scran, Cellranger or Seurat.                                                                                                                           |
| Digital Cell Sorter <sup>21</sup> | Marker-based    | python | Clusters of cells | Weighted sums of marker gene expression                | Yes               | Includes a clustering pipeline. Supports markers that are shared across multiple cell-types. Permutation-based significance calculation.                                                                                                                                                                         |

|                            |                          |        |                                   |                                                       |     |                                                                                                                                                                                                                                                                                                        |
|----------------------------|--------------------------|--------|-----------------------------------|-------------------------------------------------------|-----|--------------------------------------------------------------------------------------------------------------------------------------------------------------------------------------------------------------------------------------------------------------------------------------------------------|
| scCATCH <sup>22</sup>      | Marker-based             | R      | Clusters of cells                 | Wilcoxon rank sum test, then Evidence-weighted scores | Yes | Provides integrated reference from: CancerSEA, CellMarker, MCA, CD Marker Handbook for human and mouse. Built-in identification of cluster-marker genes. Compatible with Seurat analysis pipeline.                                                                                                     |
| GSEA/GSVA <sup>23,24</sup> | Marker-based             | R/Java | Clusters of cells                 | Enrichment test                                       | Yes | Markers must all be differentially expressed in the same direction in the cluster.                                                                                                                                                                                                                     |
| Garnett <sup>25</sup>      | Reference & Marker-based | R      | Single cells or clusters of cells | Elastic-net regression classifier                     | Yes | Uses known markers to train a classifier on a reference data set which then annotates a novel data set. Supports hierarchical cell-type labels. Both positive and negative markers are usable. Pre-trained classifiers for human lung, mouse lung, human pbmcs, mouse brain, and C. elegans available. |
| scANVI/scVI <sup>26</sup>  | Integration              | python | Single cells                      | Neutral network                                       | Yes | Integrates data by estimating a common generative model across samples. Scales to large data sets.                                                                                                                                                                                                     |
| Harmony <sup>27</sup>      | Integration              | R      | Single cells                      | Iterative clustering and adjustment                   | Yes | Integrates only lower-dimensional projections of the data. Seamlessly integrated into Seurat pipeline.                                                                                                                                                                                                 |
| Seurat-CCA <sup>28</sup>   | Integration              | R      | Single cells                      | MNN-anchors + Canonical correlation analysis          | Yes | Accuracy depends on accuracy of MNN-anchors.                                                                                                                                                                                                                                                           |
| mnnCorrect <sup>29</sup>   | Integration              | R      | Single cells                      | MNN-pairs + SVD                                       | Yes | Accuracy depends on accuracy of MNN-pairs.                                                                                                                                                                                                                                                             |
| LIGER <sup>30</sup>        | Integration              | R      | Single cells                      | Non-negative matrix factorization                     | Yes | Allows interpretation of data set specific and shared factors of variation                                                                                                                                                                                                                             |

\*\* Acronyms: MNN = mutual-nearest neighbour, SVD = singular value decomposition, SVM = support vector machine, RF = random forest, KNN = k-nearest-neighbours, LDA = Linear Discriminant Analysis, NMC = nearest-mean classifier

## Supplementary References

1. Fu, R. *et al.* clustifyr: an R package for automated single-cell RNA sequencing cluster classification. *F1000Res.* **9**, 223 (2020).
2. Tan, Y. & Cahan, P. SingleCellNet: A Computational Tool to Classify Single Cell RNA-Seq Data Across Platforms and Across Species. *Cell Syst.* **9**, 207-213.e2 (2019).
3. Abdelaal, T. *et al.* A comparison of automatic cell identification methods for single-cell RNA sequencing data. *Genome Biol.* **20**, 194 (2019).

4. Boufeaa, K., Seth, S. & Batada, N. N. Mapping transcriptionally equivalent populations across single cell RNA-seq datasets. *BioRxiv* (2018). doi:10.1101/470203
5. Kiselev, V. Y., Yiu, A. & Hemberg, M. scmap: projection of single-cell RNA-seq data across data sets. *Nat. Methods* **15**, 359–362 (2018).
6. Aran, D. *et al.* Reference-based analysis of lung single-cell sequencing reveals a transitional profibrotic macrophage. *Nat. Immunol.* **20**, 163–172 (2019).
7. Hou, R., Denisenko, E. & Forrest, A. R. R. scMatch: a single-cell gene expression profile annotation tool using reference datasets. *Bioinformatics* **35**, 4688–4695 (2019).
8. Alquicira-Hernandez, J., Sathe, A., Ji, H. P., Nguyen, Q. & Powell, J. E. scPred: accurate supervised method for cell-type classification from single-cell RNA-seq data. *Genome Biol.* **20**, 264 (2019).
9. Johnson, T. S. *et al.* LAMBDA: label ambiguous domain adaptation dataset integration reduces batch effects and improves subtype detection. *Bioinformatics* **35**, 4696–4706 (2019).
10. Crow, M., Paul, A., Ballouz, S., Huang, Z. J. & Gillis, J. Characterizing the replicability of cell types defined by single cell RNA-sequencing data using MetaNeighbor. *Nat. Commun.* **9**, 884 (2018).
11. Lieberman, Y., Rokach, L. & Shay, T. CaSTLe - Classification of single cells by transfer learning: Harnessing the power of publicly available single cell RNA sequencing experiments to annotate new experiments. *PLoS ONE* **13**, e0205499 (2018).
12. de Kanter, J. K., Lijnzaad, P., Candelli, T., Margaritis, T. & Holstege, F. C. P. CHETAH: a selective, hierarchical cell type identification method for single-cell RNA sequencing. *Nucleic Acids Res.* **47**, e95 (2019).
13. Pedregosa, F. *et al.* Scikit-learn: Machine Learning in Python. *J Mach Learn Res* **12**, 2825–2830 (2011).
14. Ma, F. & Pellegrini, M. ACTINN: automated identification of cell types in single cell RNA

- sequencing. *Bioinformatics* **36**, 533–538 (2020).
15. Wagner, F. & Yanai, I. Moana: A robust and scalable cell type classification framework for single-cell RNA-Seq data. *BioRxiv* (2018). doi:10.1101/456129
  16. Cao, Z.-J., Wei, L., Lu, S., Yang, D.-C. & Gao, G. Searching large-scale scRNA-seq databases via unbiased cell embedding with Cell BLAST. *Nat. Commun.* **11**, 3458 (2020).
  17. Wang, S., Pisco, A. O., Karkanias, J. & Altman, R. B. Unifying single-cell annotations based on the Cell Ontology. *BioRxiv* (2019). doi:10.1101/810234
  18. Van de Sande, B. *et al.* A scalable SCENIC workflow for single-cell gene regulatory network analysis. *Nat. Protoc.* **15**, 2247–2276 (2020).
  19. Zhang, Z. *et al.* SCINA: A Semi-Supervised Subtyping Algorithm of Single Cells and Bulk Samples. *Genes (Basel)* **10**, (2019).
  20. Cao, Y., Wang, X. & Peng, G. SCSA: A Cell Type Annotation Tool for Single-Cell RNA-seq Data. *Front. Genet.* **11**, 490 (2020).
  21. Domanskyi, S., Hakansson, A., Bertus, T., Paternostro, G. & Piermarocchi, C. Digital Cell Sorter (DCS): a cell type identification, anomaly detection, and Hopfield landscapes toolkit for single-cell transcriptomics. *BioRxiv* (2020). doi:10.1101/2020.07.17.208710
  22. Shao, X. *et al.* scCATCH: Automatic Annotation on Cell Types of Clusters from Single-Cell RNA Sequencing Data. *iScience* **23**, 100882 (2020).
  23. Subramanian, A., Kuehn, H., Gould, J., Tamayo, P. & Mesirov, J. P. GSEA-P: a desktop application for Gene Set Enrichment Analysis. *Bioinformatics* **23**, 3251–3253 (2007).
  24. Hänzelmann, S., Castelo, R. & Guinney, J. GSVA: gene set variation analysis for microarray and RNA-seq data. *BMC Bioinformatics* **14**, 7 (2013).
  25. Pliner, H. A., Shendure, J. & Trapnell, C. Supervised classification enables rapid annotation of cell atlases. *Nat. Methods* **16**, 983–986 (2019).
  26. Xu, C. *et al.* Harmonization and Annotation of Single-cell Transcriptomics data with Deep Generative Models. *BioRxiv* (2019). doi:10.1101/532895

27. Korsunsky, I. *et al.* Fast, sensitive and accurate integration of single-cell data with Harmony. *Nat. Methods* **16**, 1289–1296 (2019).
28. Satija, R., Farrell, J. A., Gennert, D., Schier, A. F. & Regev, A. Spatial reconstruction of single-cell gene expression data. *Nat. Biotechnol.* **33**, 495–502 (2015).
29. Haghverdi, L., Lun, A. T. L., Morgan, M. D. & Marioni, J. C. Batch effects in single-cell RNA-sequencing data are corrected by matching mutual nearest neighbors. *Nat. Biotechnol.* **36**, 421–427 (2018).
30. Welch, J. D. *et al.* Single-Cell Multi-omic Integration Compares and Contrasts Features of Brain Cell Identity. *Cell* **177**, 1873–1887.e17 (2019).
